# Supplementary material for: The Effect of Omega-3 Fatty Acids on Thromboxane, Brain-Derived Neurotrophic Factor, Homocysteine, and Vitamin D in Depressive Children and Adolescents: Randomized Controlled Trial
Source: MDPI journal article supplement (doi:10.3390/nu13041095), 2021-03-27
Supplement: s1 [file s1]

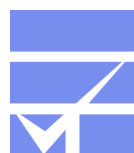

# CONSORT

TRANSPARENT REPORTING of TRIALS

## CONSORT 2010 Flow Diagram

### Enrollment

Assessed for eligibility (n=96)

Excluded (n=36)

- ♦ Not meeting inclusion criteria (n=11)
- ♦ Declined to participate (n=10)
- ♦ Travelling problems (n=6)
- ♦ Intolerance to blood taking (n=9)

Randomized (n=60)

### Allocation

#### Omega 3 (n= 30)

- ♦ Received allocated intervention (n= 30)
- ♦ Did not receive intervention whole period (n=1)
  - Taste of supplement (n=1)
- Subgroup with DD (n=17, 58.6%)
- Subgroup with MADD (n=12, 41.4%)
- Treated for at least one month before enrollment (n=14. 48.3%)
- Firstly diagnosed (n=15, 51.7%)

#### Omega 6 (n= 30)

- ♦ Received allocated intervention (n=30)
- ♦ Did not receive intervention whole period (n=1)
  - Non-compliance (n=1)
- Subgroup with DD (n=13, 44.8%)
- Subgroup with MADD (n=16, 55.2%)
- Treated for at least one month before enrollment (n=10, 34.5%)
- Firstly diagnosed (n=19, 65.5%)

### Follow-Up

#### Discontinued participation after week 12 (n=1)

- Non-compliance (n=1)

#### Discontinued participation after week 12 (n=5)

- Non-compliance (n=1)
- Problem with travelling (n=2)
- Intolerance to blood taking (n=2)

### Investigation

Analysed (n=29)

- ♦ Excluded from analysis (n=0)

Analysed (n=29)

- ♦ Excluded from analysis (n=0)
